# Supplementary material for: Electronic and elastic properties of metastable Zr3N4: a joint experimental and theoretical study
Source: Royal Society of Chemistry journal article supplement (doi:10.1039/d3cp05917k), 2024-01-01
Supplement: d3cp05917k1.pdf [file d3cp05917k1.pdf]

## Supplementary Material

### Electronic and elastic properties of metastable $Zr_3N_4$ : a joint experimental and theoretical study

Yuhe Liu<sup>1,2,#</sup>, Kunlun Wang<sup>1,2,#</sup>, Nina Ge<sup>3</sup>, Hui Sun<sup>1,2</sup>, Bo Dai<sup>3</sup>, Yong Wang<sup>1,2,\*</sup>

<sup>1</sup> School of Space Science and Physics, Shandong University, Weihai 264209, China.

<sup>2</sup> Weihai Research Institute of Industrial Technology, Shandong University, Weihai 264209, China.

<sup>3</sup> State Key Laboratory for Environmental-friendly Energy Materials, Southwest University of Science and Technology, Mianyang 621010, China.

# These authors contribution equally.

\*Corresponding author: Yong Wang: [wang.yong06@sdu.edu.cn](mailto:wang.yong06@sdu.edu.cn)

**Table S1** shows the comparison between theoretical  $d$ -space values (nm) of o- $Zr_3N_4$  and the values of our thin film measured by electron diffraction. The well consistency between theoretical and experimental values indicates the thin film is o- $Zr_3N_4$ .

**Table S1.** The comparison between theoretical  $d$ -space values (nm) of o- $Zr_3N_4$  and the values of our thin film measured by electron diffraction.

| (hkl) | Theoretical $d$ values | Measured $d$ values (ED) |
|-------|------------------------|--------------------------|
| 310   | 0.310                  | 0.309                    |
| 201   | 0.272                  | 0.271                    |
| 410   | 0.237                  | 0.238                    |
| 421   | 0.184                  | 0.187                    |
| 511   | 0.165                  | 0.166                    |

**Table S2** shows the experimental hardness values and Young's modulus of ZrN and o-Zr<sub>3</sub>N<sub>4</sub> thin films. The hardness values of ZrN and o-Zr<sub>3</sub>N<sub>4</sub> thin films are approximately 19.26 GPa and 7.90 GPa, which are close to the calculated hardness values of ZrN (18.06 GPa) and o-Zr<sub>3</sub>N<sub>4</sub> (6.98 GPa). At the same time, the experimental Young's moduli (314.53 GPa for ZrN and 171.54 GPa for o-Zr<sub>3</sub>N<sub>4</sub>) also agree with the calculated results (385.86 GPa for ZrN and 212.56 GPa for o-Zr<sub>3</sub>N<sub>4</sub>). The consistency between experimental values and calculated results indicates the accuracy of the calculations.

**TABLE S2.** The experimental hardness values and Young's modulus of ZrN and o-Zr<sub>3</sub>N<sub>4</sub> thin films.

|                | <b>ZrN</b>     |                | <b>o-Zr<sub>3</sub>N<sub>4</sub></b> |                |
|----------------|----------------|----------------|--------------------------------------|----------------|
|                | <b>H (GPa)</b> | <b>E (GPa)</b> | <b>H (GPa)</b>                       | <b>E (GPa)</b> |
| <b>1</b>       | 19.67          | 314.76         | 6.88                                 | 156.06         |
| <b>2</b>       | 21.29          | 316.19         | 7.60                                 | 182.18         |
| <b>3</b>       | 20.22          | 342.17         | 8.15                                 | 168.15         |
| <b>4</b>       | 16.40          | 255.41         | 8.21                                 | 174.53         |
| <b>5</b>       | 18.73          | 344.12         | 8.67                                 | 176.78         |
| <b>Average</b> | 19.26          | 314.53         | 7.90                                 | 171.54         |

**FIG. S1** shows the orbital-projection electronic band dispersion of ZrN calculated by VASP and DS-PAW. Both orbital-projection electronic band dispersion show consistent features that some bands cross the Fermi level and these bands are dominated by the Zr-4d character, indicating that the electrons in ZrN are mainly derived from Zr-4d electrons.

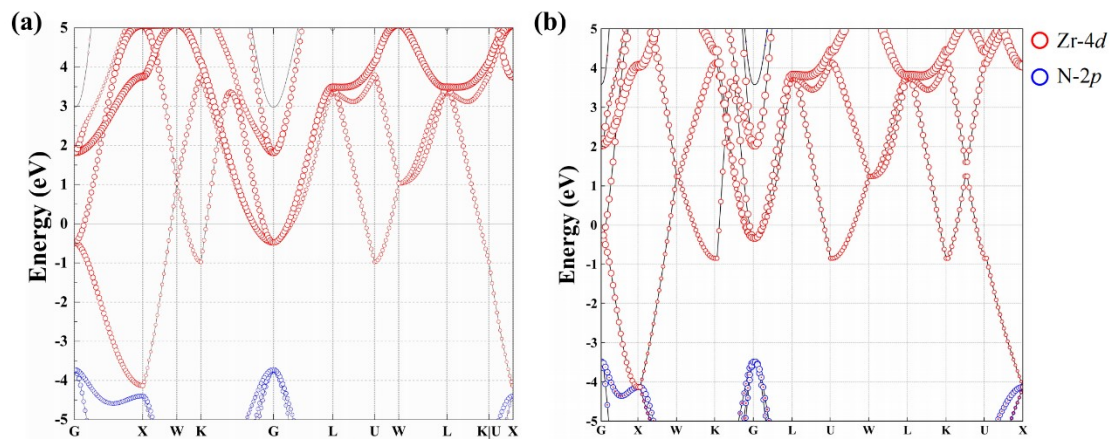

**FIG. S1.** The orbital-projection electronic band dispersion of ZrN calculated by (a) VASP and (b) DS-PAW.
